# Supplementary material
Source: PubMed Central journal article supplement (PMC3715288)
Supplement: gmb-36-214-s001.pdf [file gmb-36-214-s001.pdf]

Glyma15g13740 TRPSCP----DLVCLNLDGGYLG-----TVDDCCALIGGLGDIEATVCLCIQLRA--LGILNLR--NLQLILNACGPSYPSNATCPRT-  
 Glyma15g13750 TRPSCP----DLVCLNLDGGSLG-----TVDDCCALIGGLGDIEATVCLCIQLRA--LGILNLR--NLQLILNACGRSYPSNATCPRT-  
 Glyma15g13760 PQPSCP----DLVCLNLDG-----SPADDCCALIDGLVDLEASVCLCIQLRA--LEIVDDL--NLRLILNACGPSNTTNATCDRT-  
 Glyma15g13770 SGPSCP----DLVCLNLDG-----SPADDCCALIDGLVDLEASVCLCIQLR--VLGIVNLDL--NLQLILNACGPSYPSNATCPRT-  
 Glyma05g04450 PQRTPVDALKLGLCLDVLGGLVHVIGNPVENVCCPVIQGLLDLEAAIQLCTVIRAKLLN-LSIFLPIALQVLVT--CGKTPPGFVCPPLY  
 Glyma17g14900 PQRTPIDALKLGLCLDVLGGLVHVIGNPVENVCCPVIQGLLDLEAAIQLCTVIRAKLLN-LNIFLPLALQLLVT--CGKTAPPGFVCPPLY  
 Glyma13g22940 AQATCPIDTLKLGACVDLLGGLVHVIGLDPVANQCCPVLQGLVEVEAAVGLCTTLKLLN-LNIYVPLALQLLVA--CGKSPPGYTCSL--  
 Glyma17g11940 AQATCPIDTLKLGACVDLLGGLVHVIGLDPVANQCCPVLQGLVEVEAAVGLCTTLKLLN-LNIYVPLALQLLVT--CGKSPPGYTCSL--  
 Glyma13g11090 AQPTCPIDTLKLGACVDLGGLIHIGIGSSAQQTCCPVLQGLVDLEAAVGLCTTIRAKILN-INIIPIALQLLID--CGKTPPDGFKADS-  
 Glyma20g06290 AQPTCPIDSLKLGACVDLGGLIHIGIGSSAQQTCCPVLQGLVDLEAAVGLCTTIRAKILN-INIIPIALQLLID--CGKTPPDGFKADS-  
 Glyma01g17820 SPQKCPKDTLKFVCGSWLG-LVKEVIGTKPSECCILLKGLADLEAAALGLCTAIKANVGLGAVKVKVHVAVSLLVNA--CGKSPVSGFVCA--  
 Glyma04g06970 NKASCPKDTLKLGAADLLG-LVNIIVGTPSSQCCALIKGLADLEAAALGLCTAIKSNVGL-INLNVVTVLSVLSACQKTVPVPGFQCP--  
 Glyma06g07070 PKASCPKDTLKLGVCAADILG-LVNVTVGTPSSQCCALVKGGLADLEAAALGLCTAIKANVGL-INLNVVTVLSVLSACQKTVPVPGFQCP--  
 Glyma14g14220 PSGKCPKDTLKLGVCAADVGL-LVNVVVGSPVSSKCCALLEGLADSEAAALGLCTAIKANVGL-INLNVVTVLSVLSACQKTVPVPGFQCA--  
 Glyma17g32100 PSGKCPKDTLKLGVCAADILG-LVTVVVGSPPVSSKCCALLEGLADSEAAALGLCTAIKANVGL-INLNVVTVLSVLSACQKTVPVSGFQCA--  
 Glyma05g04380 TAKSCPRDALKLGVCANVNLNPIGAVGSPDPHPCSSVLEGLLDLEAVVGLCTAIKANILG-INLNIPISLSLILNACEKSPSDFLCN--  
 Glyma17g14840 AAKSCPRDALKLGVCANVNLNPIGAVGSPDPHPCSSVLEGLLDLEAVVGLCTAIKANILG-INLNIPISLSLILNACEKSPSDFLCN--  
 Glyma20g35070 ATTGCPRDVLLKGVCSGILNGWMMFMSGLPLKTHCCSAIEGLYDFEVALGVCTALKANIMG-INLDIPISFTKLINTDCKKVPNGFICD--  
 Glyma20g35080 SDVCPNRNVLKGVCSILNGWMMFTTGLPPECCSAIADLYGLEVAAGLCTALKANIMG-INLGIPISFTKLINTDCKKVPNGFICG--  
 Glyma05g04400 RSGSCPRDALKLGVCANVNLN-LVNATLGQPPVTPCCTLLDGLVDLEAAVGLCTALKANILG-INLNLPISLSLLNVCSRKVPVPRDFQCA--  
 Glyma17g14860 PSGSCPRDALKLGVCANVNLN-LVNATLGQPPVTPCCTLLDGLVDLEAAVGLCTALKANILG-INLNLPISLSLLNVCSRKVPVPRDFQCA--  
 Glyma17g14890 PSGSCPRDALKLGVCANVNLN-LVNATLGQPPVTPCCTLLDGLVDLEAAVGLCTALKANILG-INLNLPISLSLLNVCSRKVPVPRDFQCA--  
 Glyma05g04440 PSGSCPRDALKLGVCANVNLN-LVNVTLGQPPVTPCCTLLDGLVDLEAAVGLCTALKANILG-INLNLPISLSLLNVCSRKVPVPRDFQCA--  
 Glyma05g04430 SGSSCPRDALKLGVCANVNLKGLNVTGQPPVTPCCTLLDGLVDLEAAVGLCTALKANVGL-INLNLPISLSLLNVCSRKVPVPRDFQCA--  
 Glyma17g14880 SGASCPRDALKLGVCANVNLKGLNVTGQPPVTPCCTLLDGLVDLEAAVGLCTALKANVGL-INLNLPISLSLLNVCSRQVPRDFQCA--  
 Glyma05g04390 SGASCPRDALKLGVCANVNLKGLNVTGQPPVTPCCTLLDGLVDLEAAVGLCTALKANVGL-INLNLPISLSLLNVCSRQVPRDFQCA--  
 Glyma17g14850 AAKSCPRDALKLGVCANVNLNPIGAVGSPDPHPCSSVLEGLLDLEAVVGLCTAIKANILG-INLNIPISLSLILNACEKSPSDFLCN--  
 Glyma15g17570 EASSCPREDELKLGICTNLLNRTVNIITLGEPPVIPCSSLIAQLVDLEAAVGLCTPLRQNILG-IDLDIPVIFNFIICSRVPRDFLC--  
 Glyma09g01680 QKGTCPIDALKLGVCANVNLN-LVNVKLGSPPTLPCCNLIKGLADLEVAAGLCTALKANVGL-INLNVVTVLSVILMNGGRNNA-GFQCP--  
 Glyma15g12600 QKGTCPIDALKLGVCANVNLN-LVNVKLGSPPTLPCCNLIKGLADLEVAAGLCTALKANVGL-INLNVVTVLSVILMNGGRNNA-GFQCP--  
 Glyma09g10340 QNGTCPINVLRLGVCANVNLN-LVNVTLGSPPTLPCCTLIQGLADVDVGVGLCTALRANLLG-INLNLPISLTLNLTGRGNIP-NIQCS--  
 Glyma05g04460 KQASCPKDTLKFVCGADVLG-LINVQLGKPPKTPCCNLIQGLADLEAAVGLCTALKANVGL-INLNVVTVLSVILMNGGRNNA-GFQCP--  
 Glyma05g04490 KQASCPKDTIKFVCGADVLG-LINVQLGKPPKTPCCNLIQGLADLEAAVGLCTALKANVGL-INLNVVTVLSVILMNGGRNNA-GFQCP--  
 Glyma17g14930 KQVSCPKDTVKFVCGADVLG-LINVQLGKPPKTPCCNLIQGLADLEAAVGLCTALKANVGL-INLNVVTVLSVILMNGGRNNA-GFQCP--  
 Glyma17g14910 KQVSCPKDTIKFVCGADVLG-LINVQLGKPPKTPCCNLIQGLADLEAAVGLCTALKANVGL-INLNVVTVLSVILMNGGRNNA-GFQCP--

Figure S1 - Alignment of the conserved C-terminal domains of soybean HyPRPs using Muscle software.
