# Supplementary material
Source: PubMed Central journal article supplement (PMC3715288)
Supplement: gmb-36-214-s003.pdf [file gmb-36-214-s003.pdf]

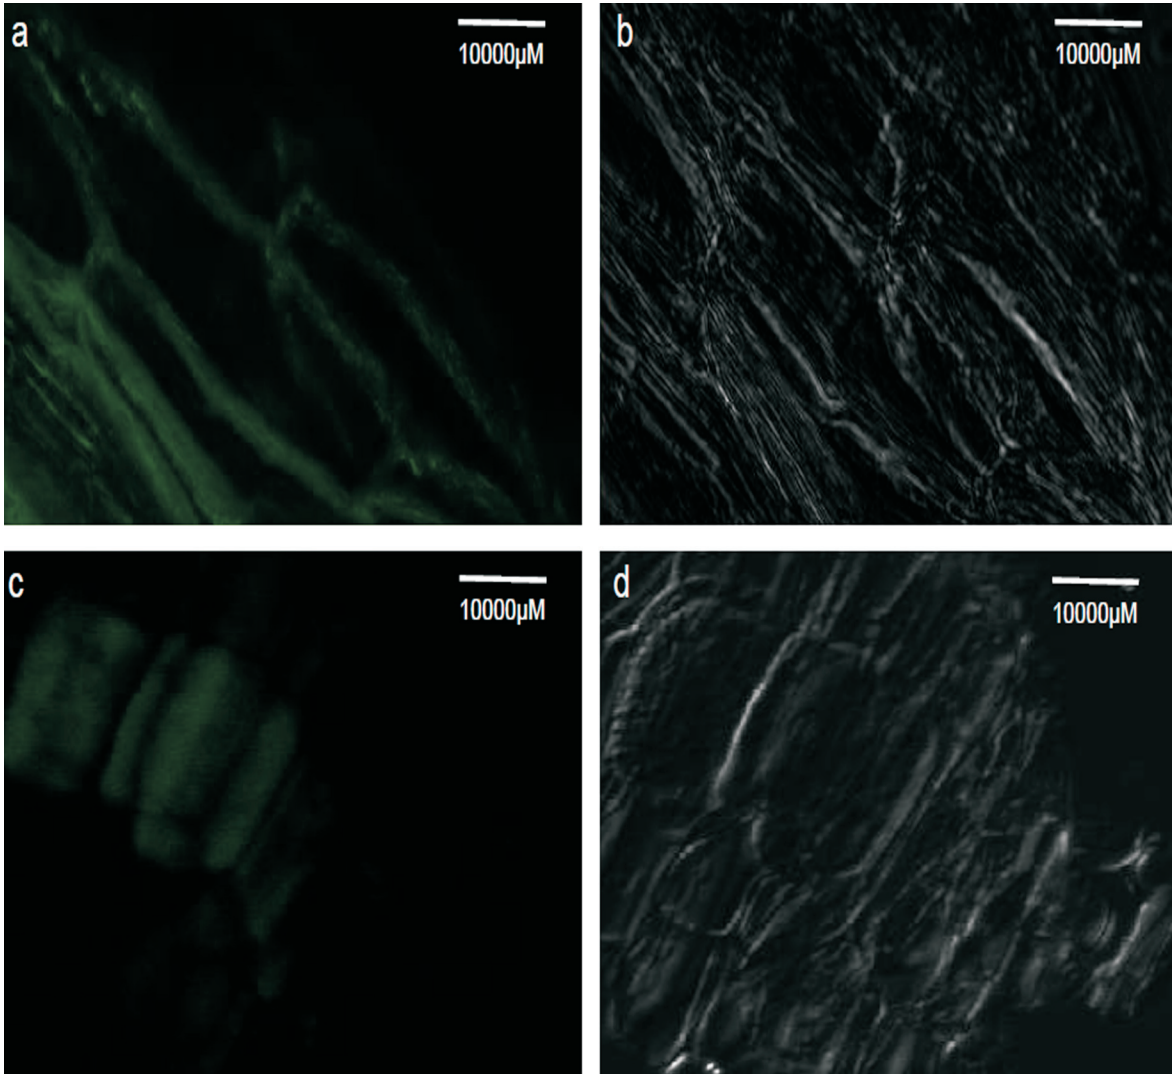

**Figure S3** - Subcellular localization of GmHyPRP16 (Phytozome gene model: Glyma14g14220; GenBank accession no. EV274235.1) in soybean root cells after dehydration. The recombinant pCAMBIA1300-(CaMV) 35S promoter-GFP+GmHyPRP16-(CaMV) 35S terminator plasmid was confirmed by DNA sequencing and inserted into *Agrobacterium rhizogenes* strain K599 by electroporation. This is the first time that the *A. rhizogenes*-mediated root transformation system has been used to obtain transgenic soybean root cells. (A) Confocal microscopy image showing the fluorescence of GmHyPRP16-GFP protein in transgenic soybean root cells expressing 35S::SbPRP-GFP. (C) Confocal microscopy image of wild-type soybean roots cell; (B) and (D) Bright field images of the cells shown in (A) and (C), respectively.
